# Supplementary material
Source: MDPI journal article supplement (https://www.mdpi.com/2073-4395/13/2/613)
Supplement: s1 [file s1]

Supplementary Table S1.

**Table S1.** Design of fluorescent quantitative PCR primers.

| Primer           | Sequence                  |
|------------------|---------------------------|
| <i>GmS0S1-F</i>  | TGTGCTGCATTTCTTCGAGC      |
| <i>GmS0S1-R</i>  | AACACGCAAAACCTGAGGGTA     |
| <i>GmS0S2a-F</i> | GAGGCTTGAAGGCGTTTCTG      |
| <i>GmS0S2a-R</i> | TTCAGCCTTTCAGTGCTCTTCT    |
| <i>GmSOS2b-F</i> | GGATCTCGCTCTCCTTTCTTTC    |
| <i>GmSOS2b-R</i> | CAACACCGAACTACGCTTACTA    |
| <i>GmSTK12-F</i> | ATGCTTGCTGCCTCTATGTCG     |
| <i>GmSTK12-R</i> | CATTAAGTGTGCAGTCATTGGACTC |
| <i>GmTUA5-F</i>  | TGCCACCATCAAGACTAAGAGG    |
| <i>GmTUA5-R</i>  | ACCACCAGGAACAACAGAAGG     |
