# Supplementary material
Source: MDPI journal article supplement (https://www.mdpi.com/2073-4395/13/2/613)
Supplement: s1 [file s1]

Supplementary Table S2.

**Table S2.** Standard solution dilution gradient.

| Cation |   | Concentration (mg/L) |   |   |    |    |
|--------|---|----------------------|---|---|----|----|
| Na     | 2 | 4                    | 6 | 8 | 10 | 12 |
| K      | 2 | 4                    | 6 | 8 | 10 | 12 |
